# Supplementary material
Source: MDPI journal article supplement (https://www.mdpi.com/2227-9717/11/7/2203)

## Supplementary Materials

**Figure S1.** Structural formulas of chemical compounds identified and/or isolated in the species *C. quercifolius*.

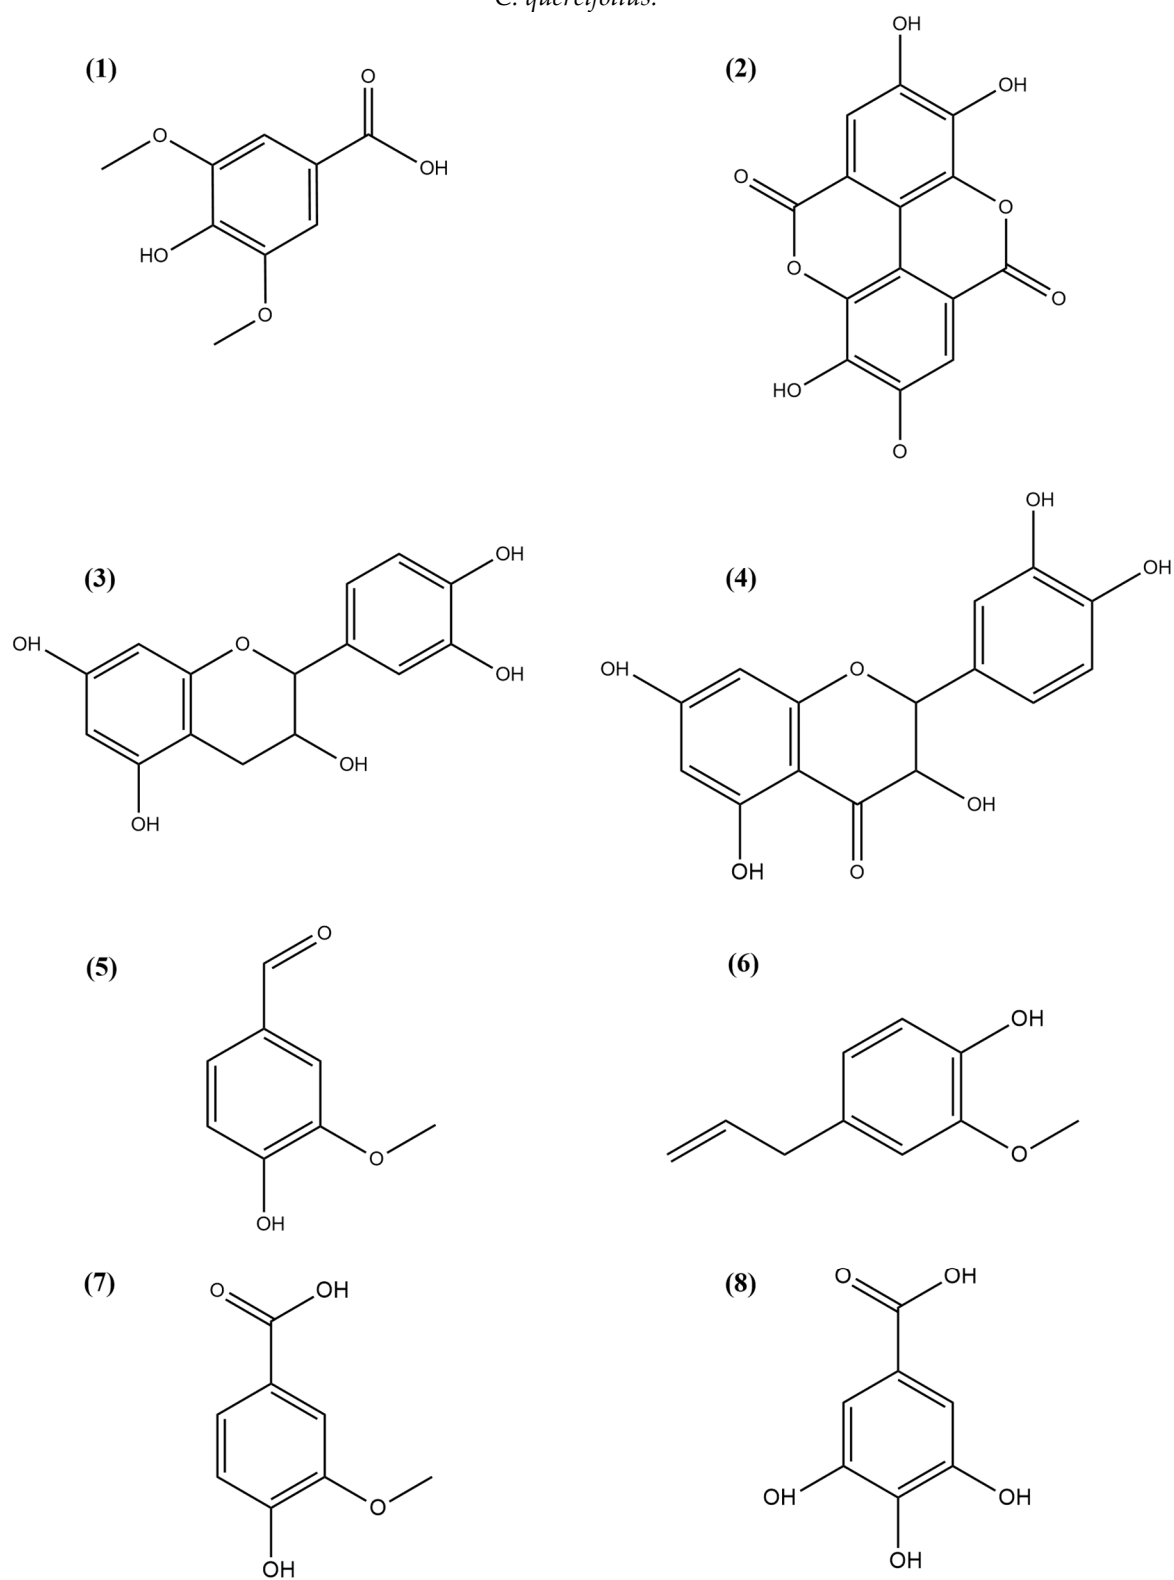

(9)

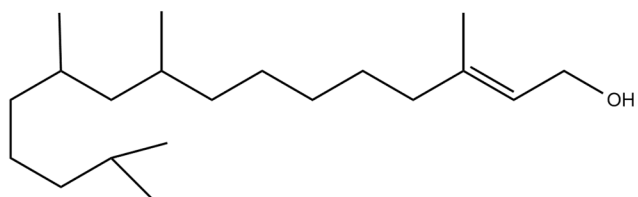

(10)

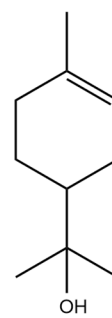

(11)

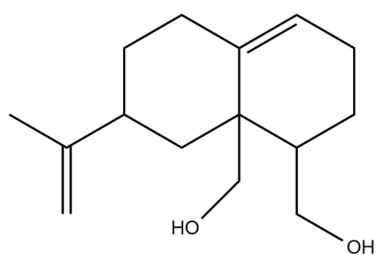

(12)

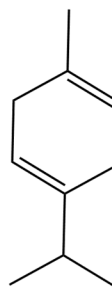

(13)

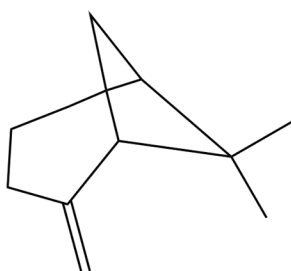

(14)

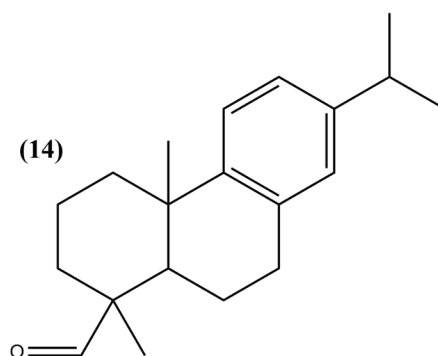

(15)

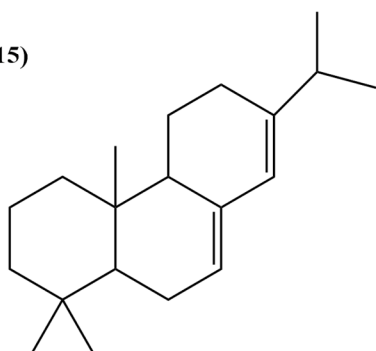

(16)

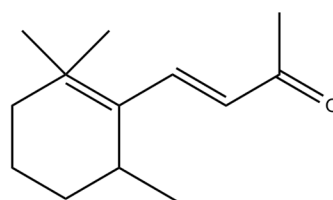

(17)

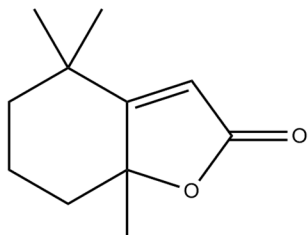

(18)

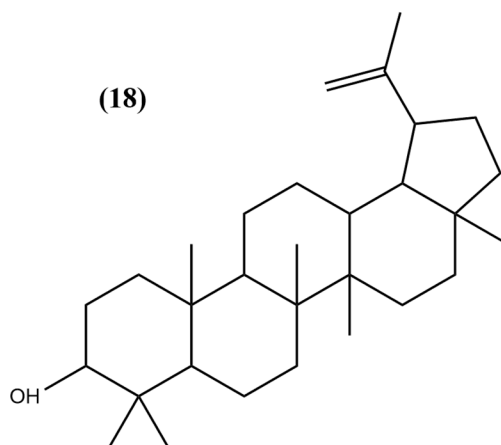

(19)

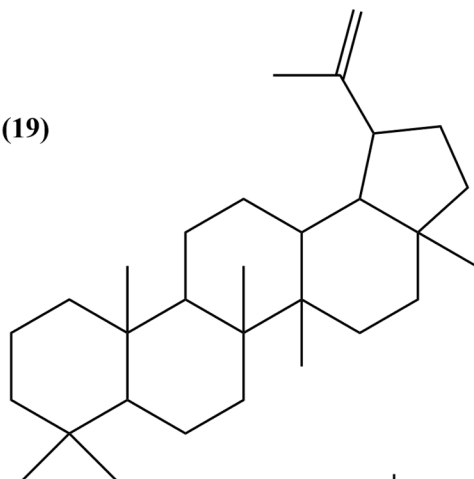

(20)

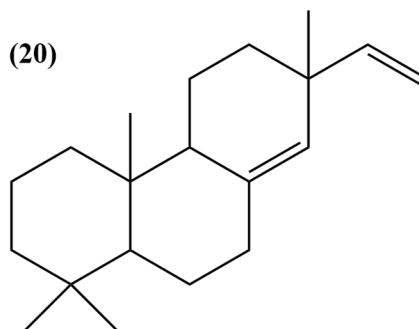

(21)

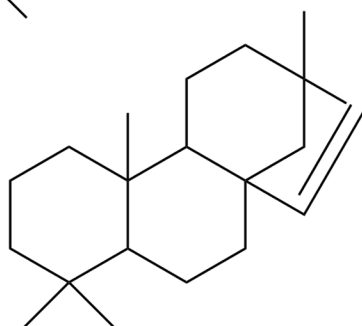

(22)

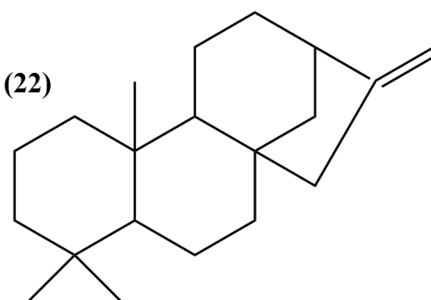

(23)

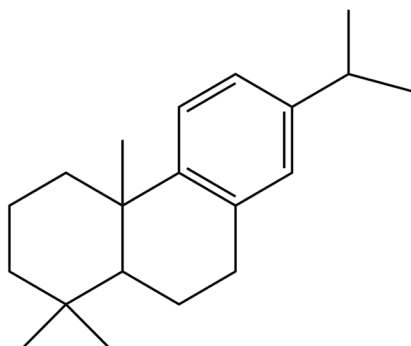

(24) R = H

(25) R = CH

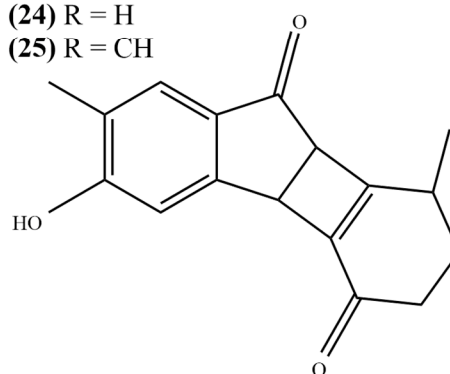

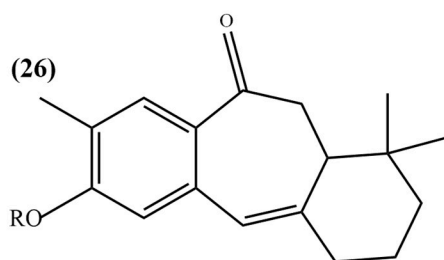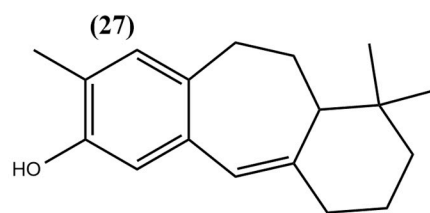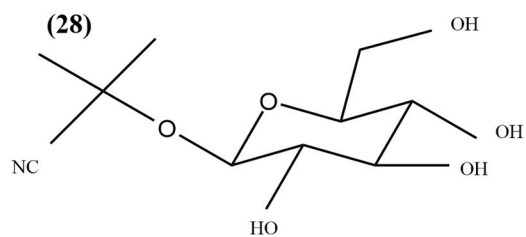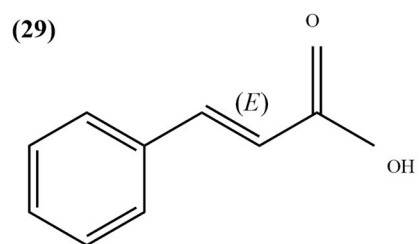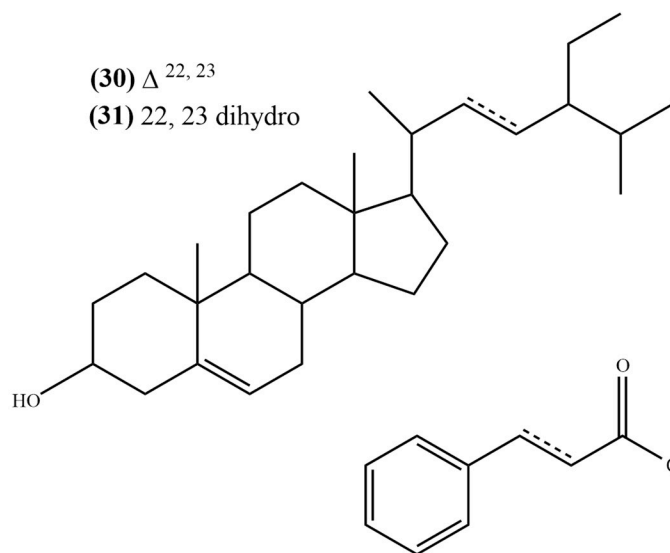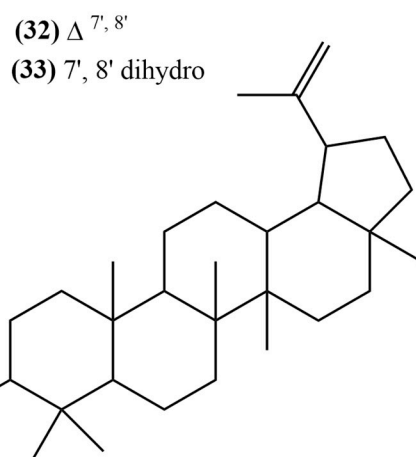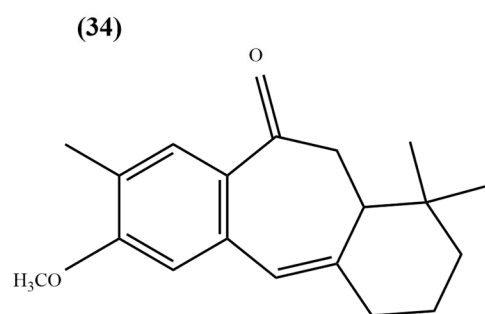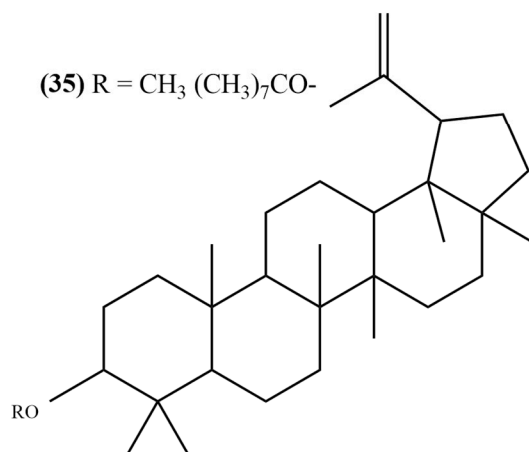

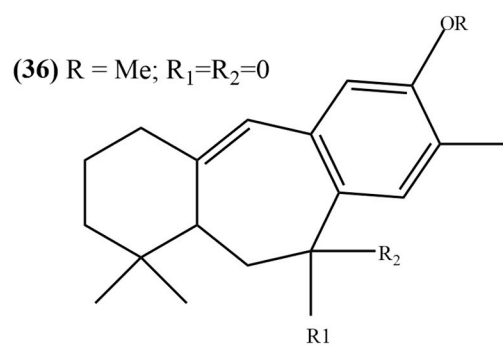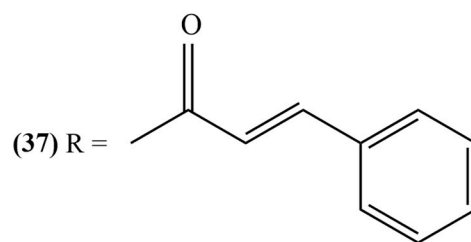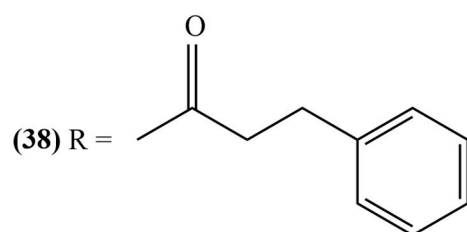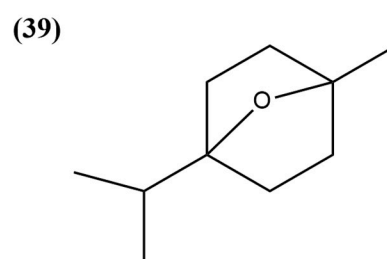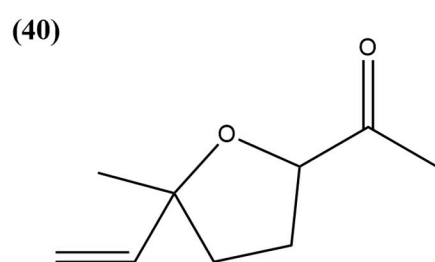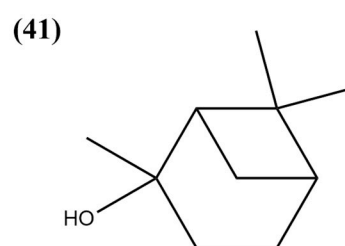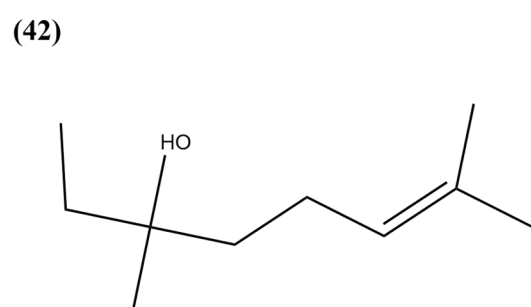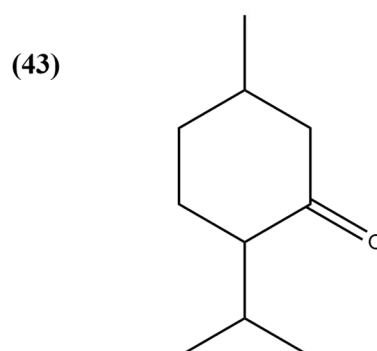

(44)

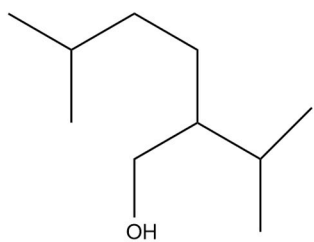

(45)

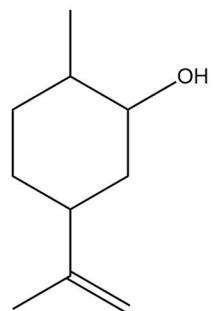

(46)

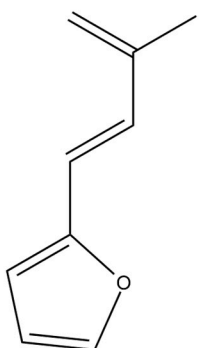

(47)

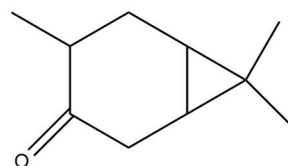

(48)

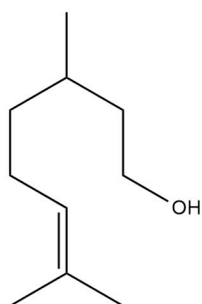

(49)

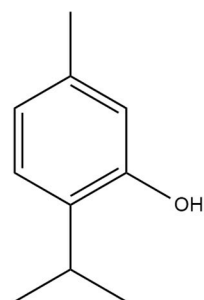

(50)

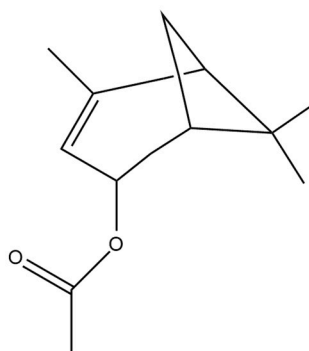

(51)

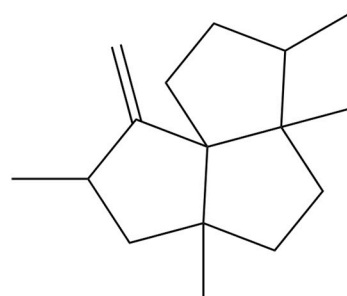

(52)

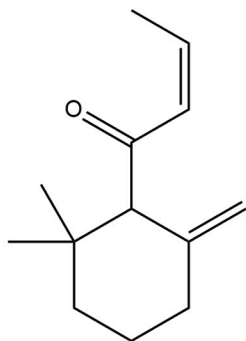

(53)

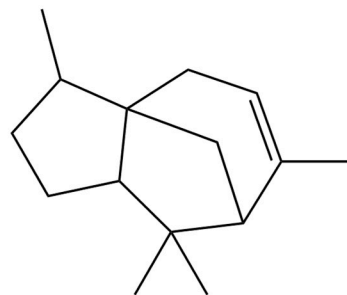

(54)

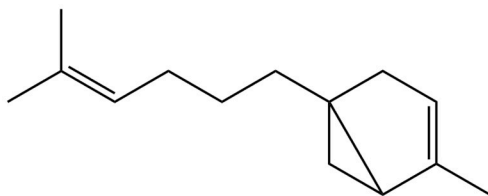

(55)

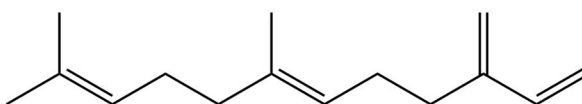

(56)

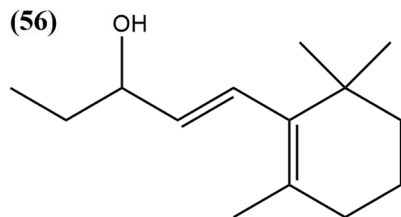

(57)

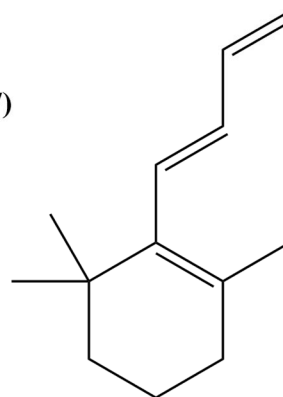

(58)

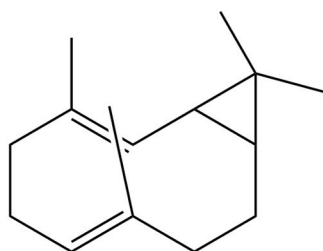

(59)

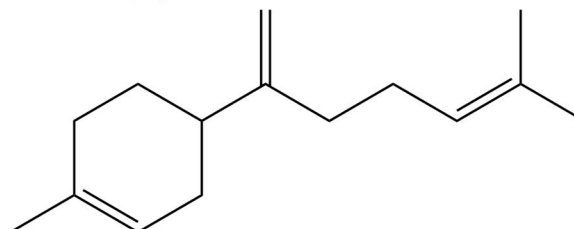

(60)

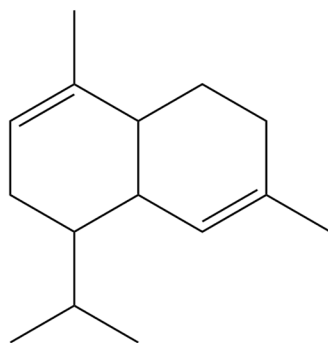

(61)

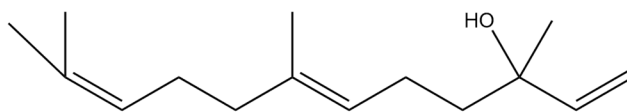

(62)

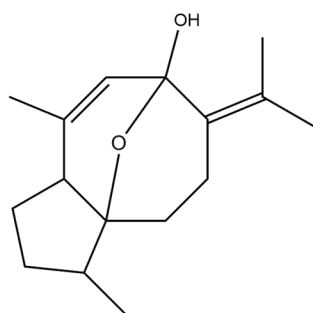

(63)

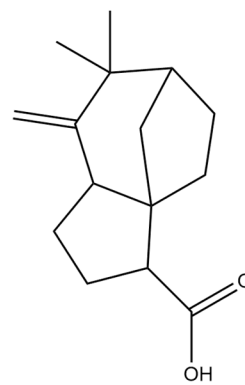

(64)

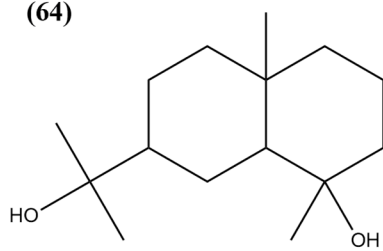

(65)

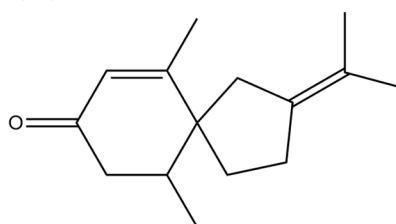

(66)

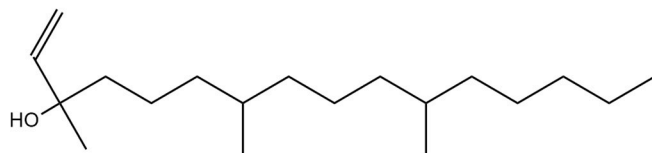

(67)

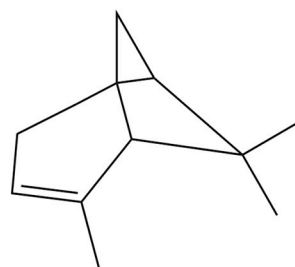



(68)

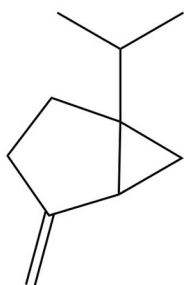

(69)

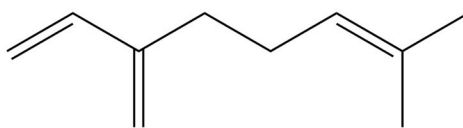

(70)

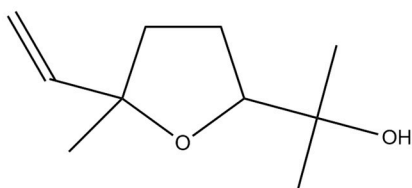

(71)

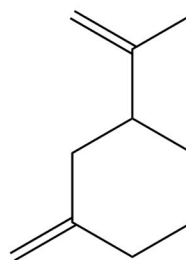

(72)

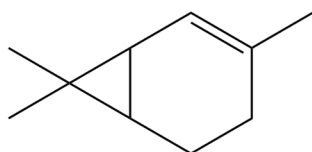

(73)

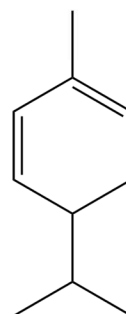

(74)

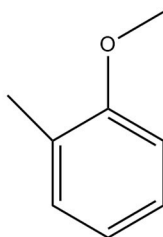

(75)

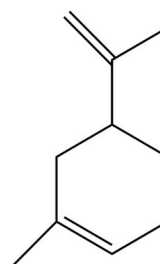

(76)

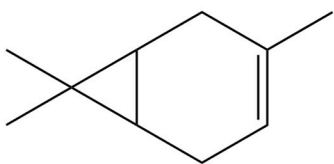

(77)

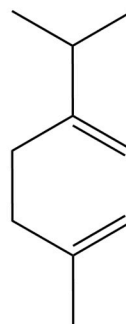

(78)

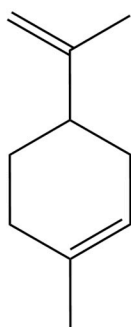

(79)

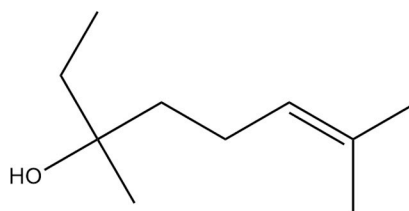

(80)

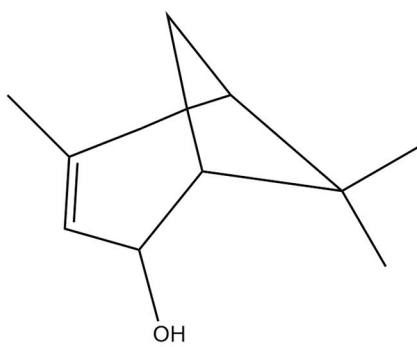

(81)

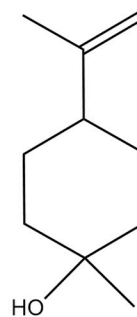

(82)

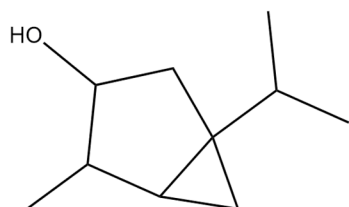

(83)

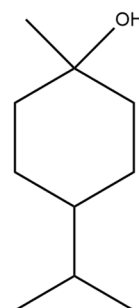



(91)

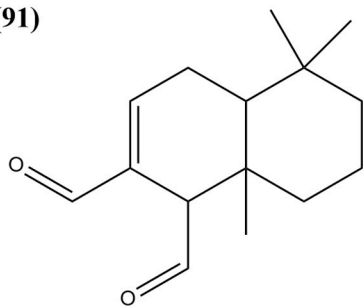

(92)

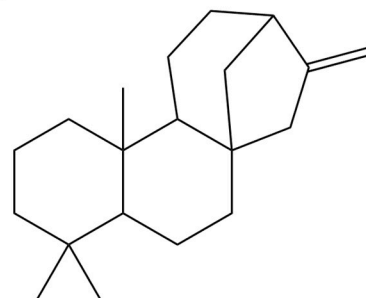

(93)

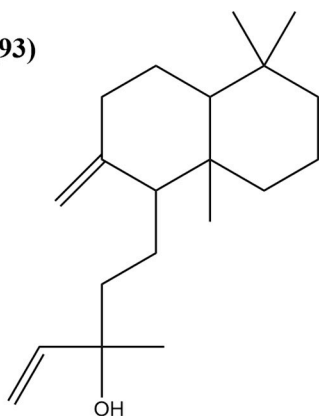

(94)

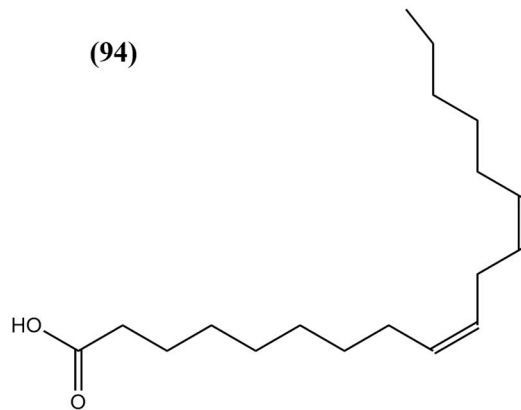

(95)

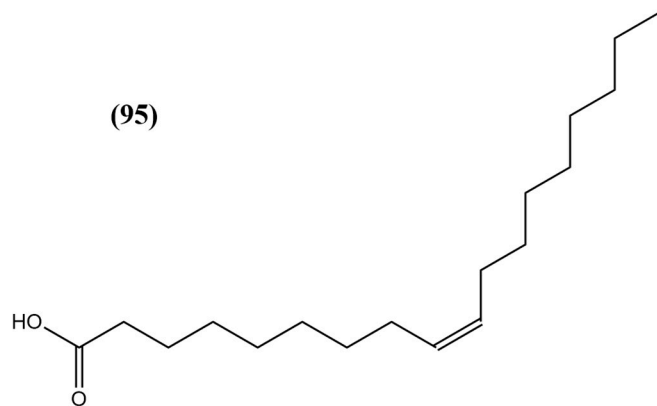

(96)

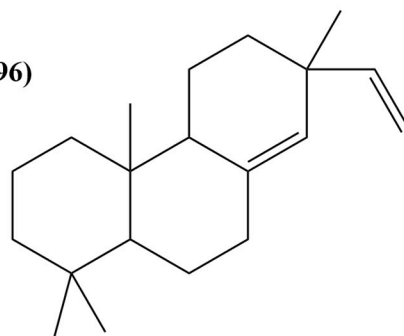

(97)

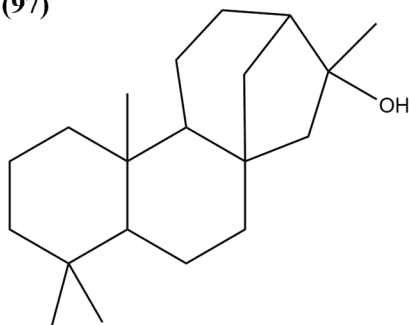

(98)

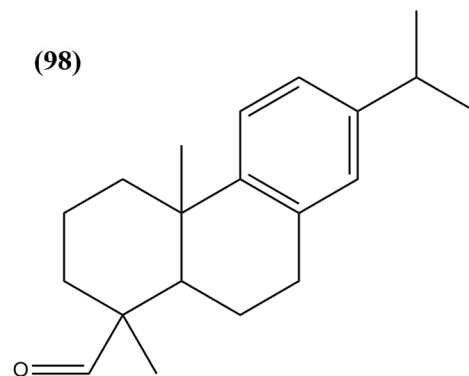

(99)

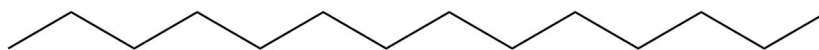

(100)

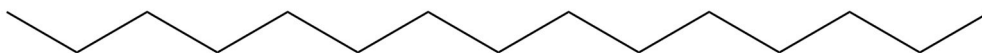

(101)

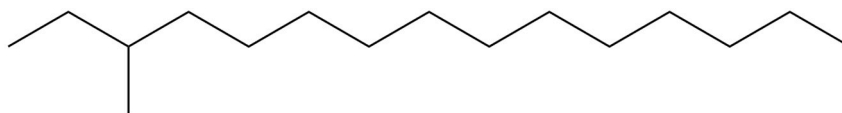

(102)

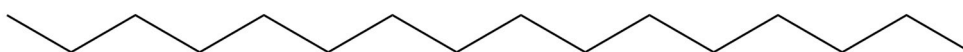

(103)

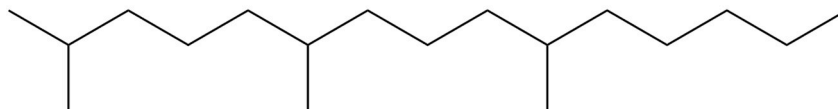

(104)

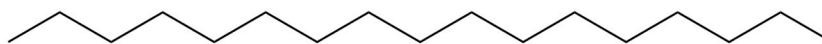

(105)

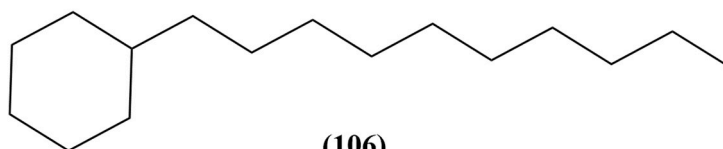

(106)

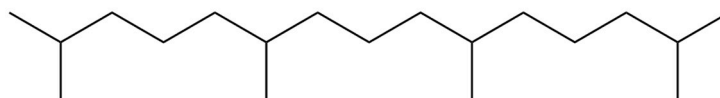

(107)

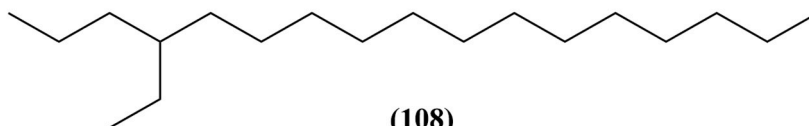

(108)

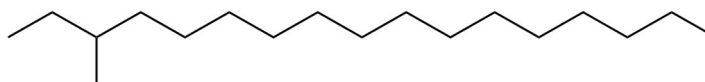

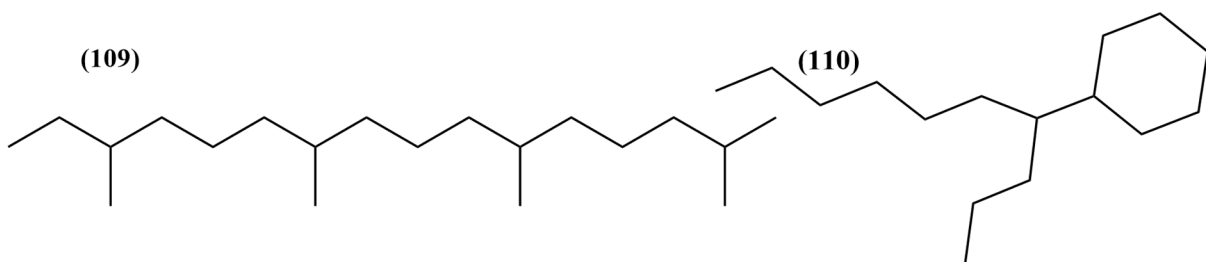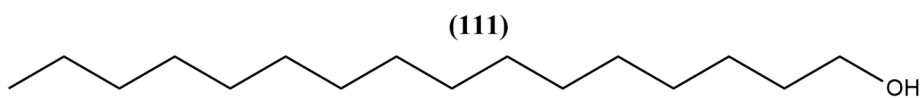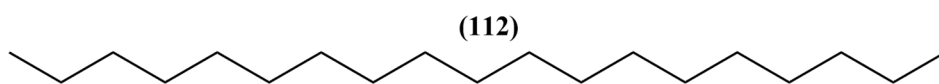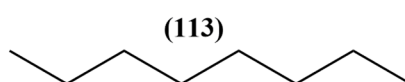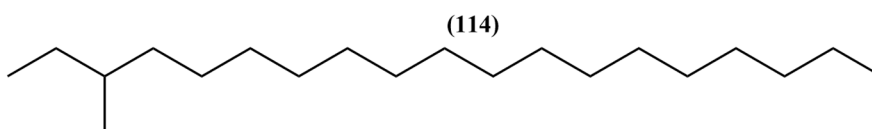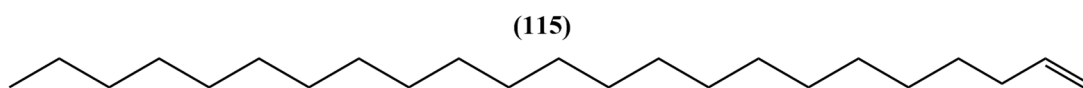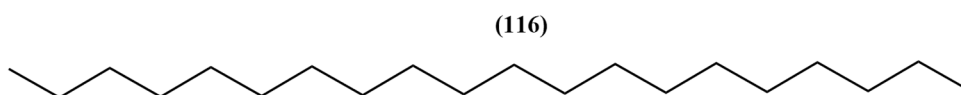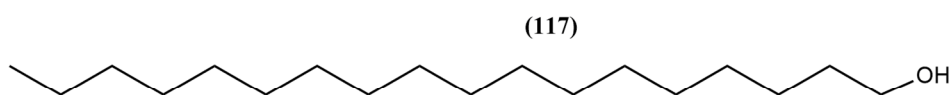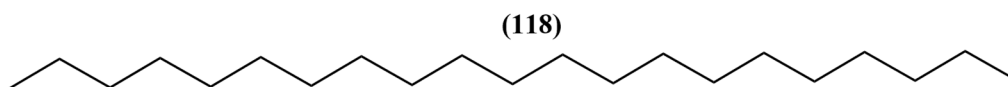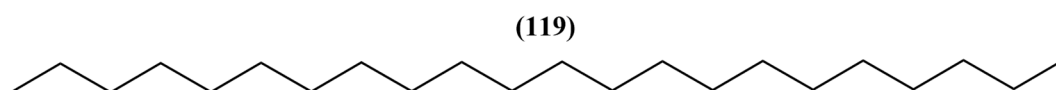

(120)

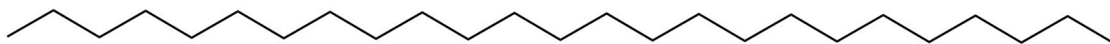

(121)

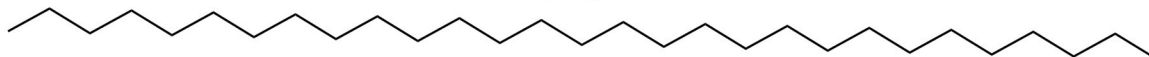

(122)

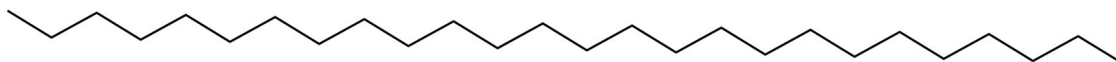

(123)

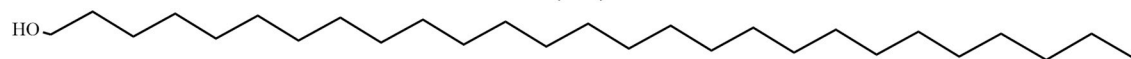

(124)

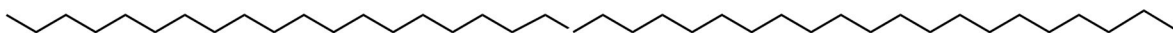

(125)

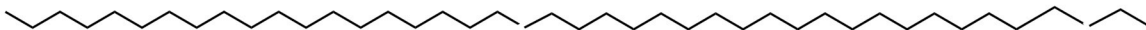

(126)

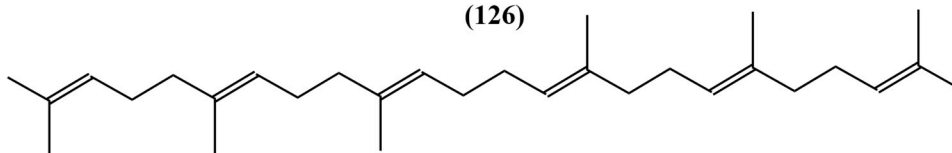

(127)

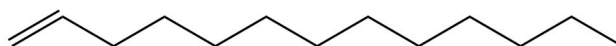

(128)

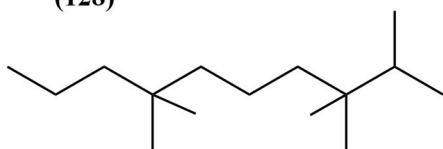

(129)

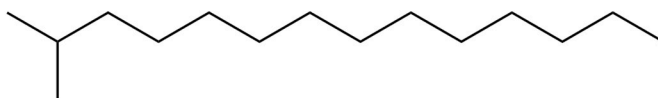

(130)

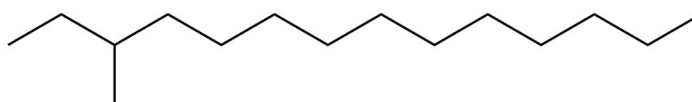

(131)

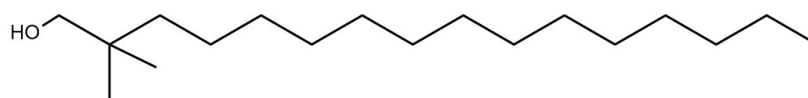

(132)

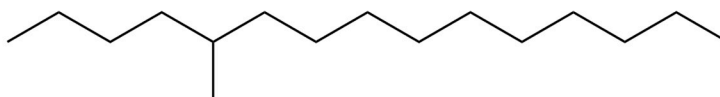

(133)

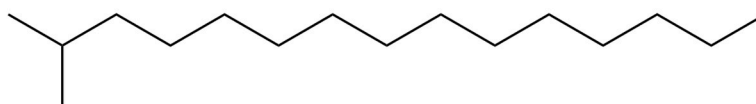

(134)

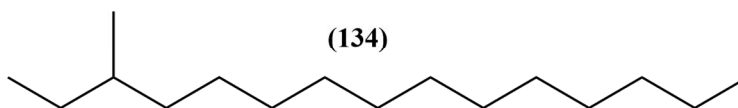

(135)

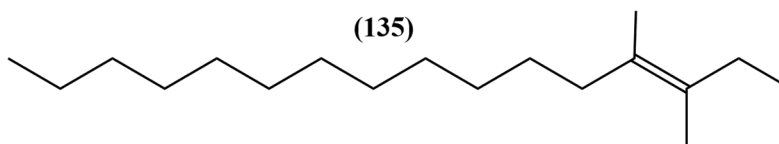



(136)

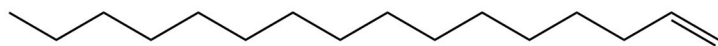

(137)

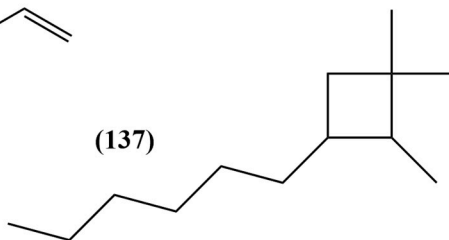

(138)

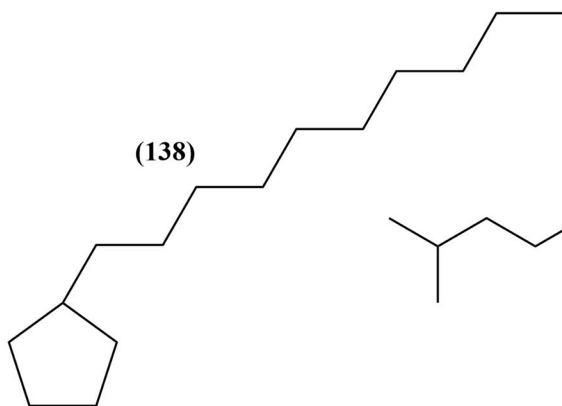

(139)

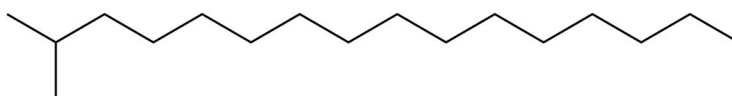

(140)

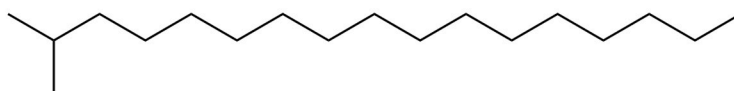

(142)

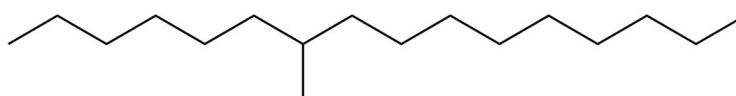

(143)

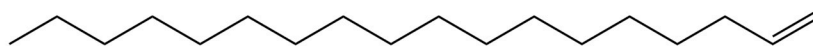

(144)

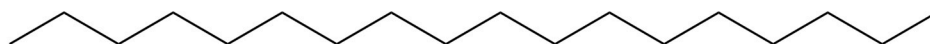

(141)

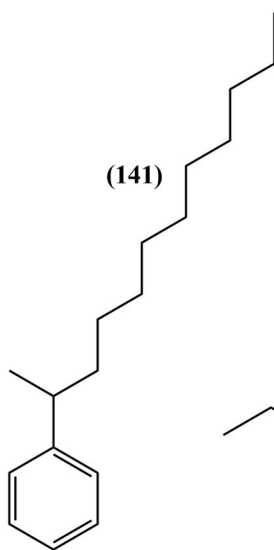

(145)

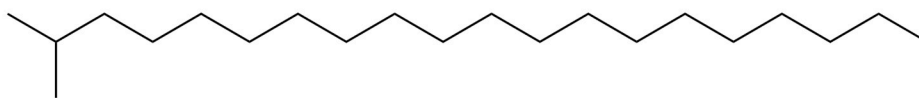

(146)

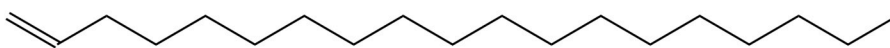

(147)

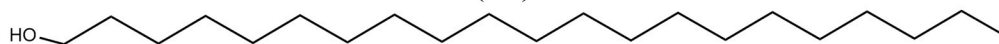

(148)

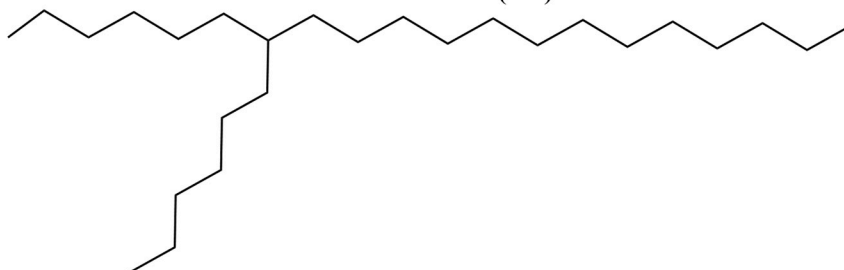

(149)

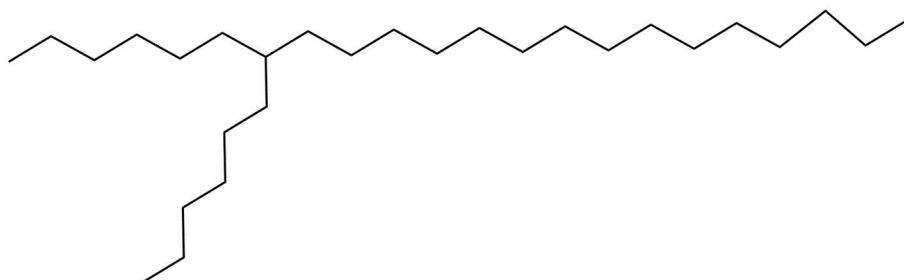

(150)

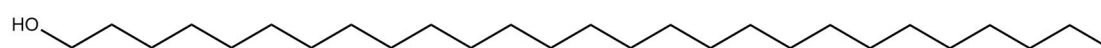

(151)

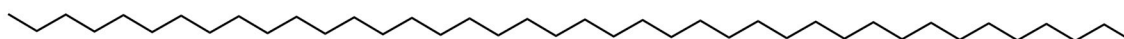

Supplement: s1 [file s1]
